# Supplementary material
Source: MDPI journal article supplement (https://www.mdpi.com/search?q=materials-12-01296)
Supplement: s001 [file materials-12-01296-s001.pdf]

Supplementary

# High Efficiency Mercury Sorption by Dead Biomass of *Lysinibacillus sphaericus*. New Insights into the Treatment of Contaminated Water

J. David Vega-Páez <sup>1</sup>, Ricardo E. Rivas <sup>2</sup> and Jenny Dussán-Garzón <sup>1,\*</sup>

<sup>1</sup> Microbiological Research Center (CIMIC), Department of Biological Sciences, Universidad de Los Andes, Bogotá 111711, Colombia; jd.vega1754@uniandes.edu.co

<sup>2</sup> Department of Chemistry, Universidad de Los Andes, Bogotá 111711, Colombia; re.rivas@uniandes.edu.co

\* Correspondence: jdussan@uniandes.edu.co; Tel.: +57-1-3394949

Received: 28 March 2019; Accepted: 12 April 2019; Published: 19 April 2019

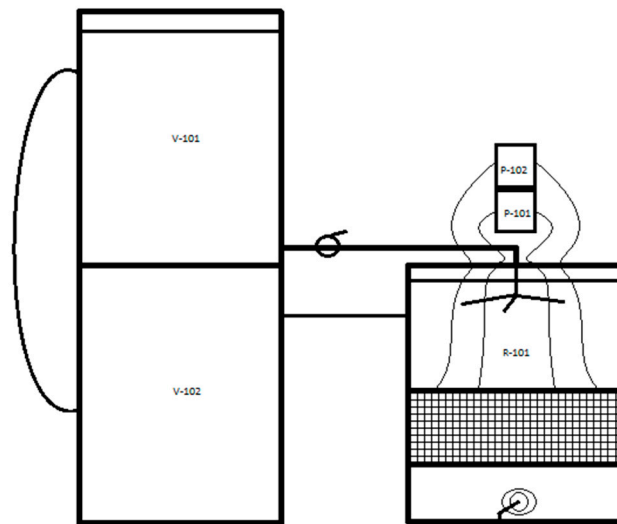

**Figure S1.** Diagram of BFB reactor designed for escalated treatment of Hg. V-101: Hg loading vessel. V-102: Secure vessel. P-101 and P-102: Air pumps for bubbling mixing in RH bed. R-101: Packed reactor with a filter filled with RH.

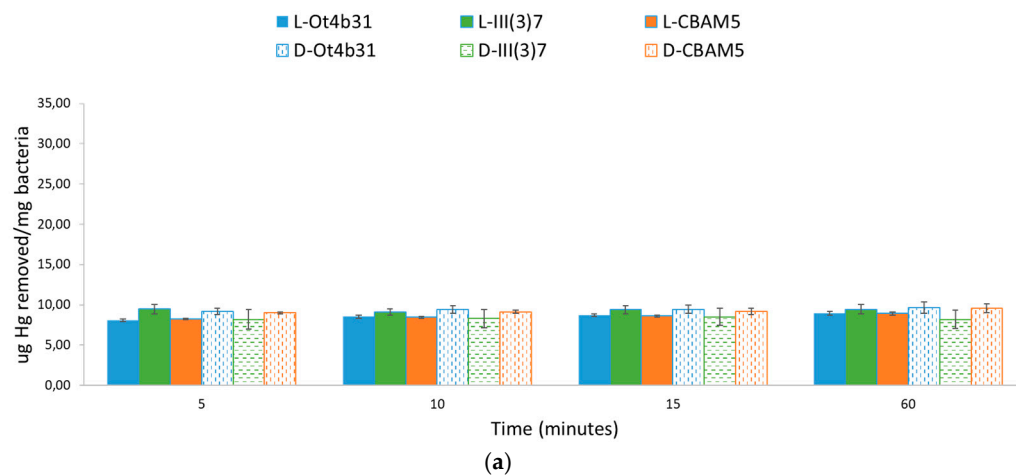

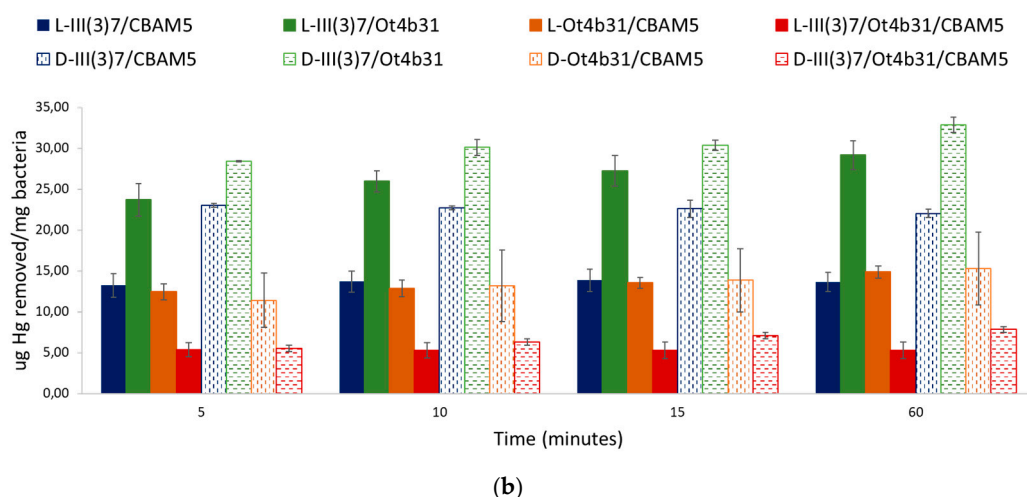

**Figure S2.** Efficiency in mercury removal. (a) Single strains efficiency. (b) Mixed strains efficiency. (D): Dead. (L): Live.

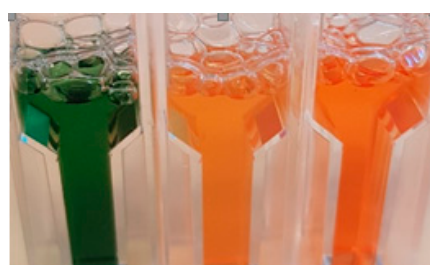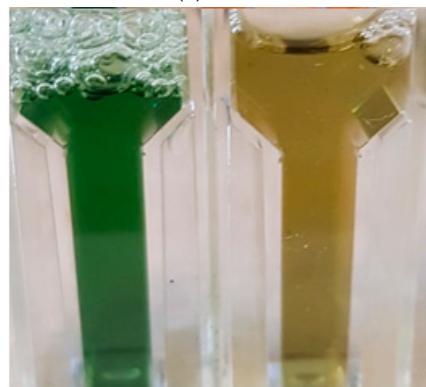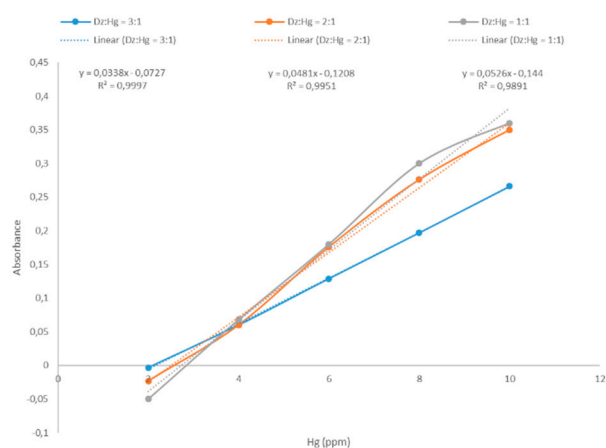

**Figure S3.** Calibration curves for dithizone. (a) Reaction in excess of mercury (0 ppm, 8 ppm and 10 ppm). (b) Reaction in excess of dithizone (0 ppm, 8 ppm). (c) Calibration curves for different proportions of Dz-Hg.

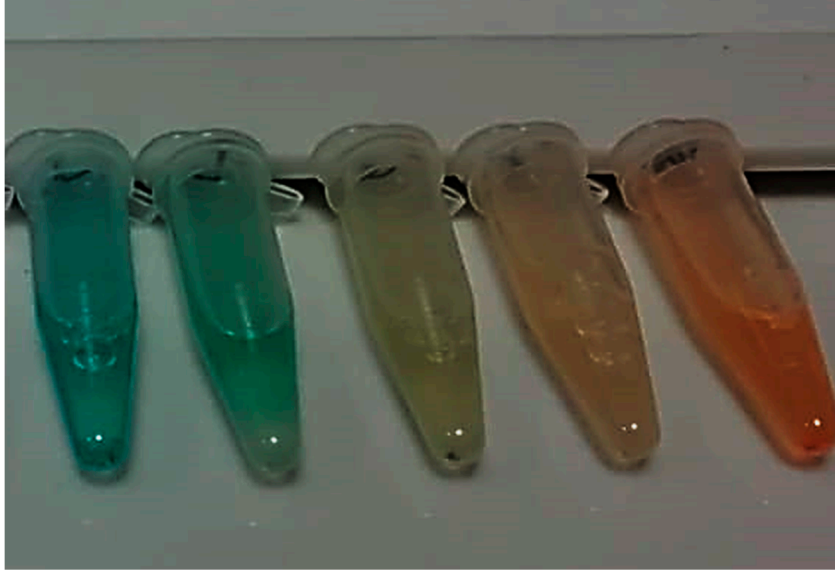

**Figure S4.** Stability of Dz in Triton X114 at different pH. From left to right: pH 3,5,6,7,8.

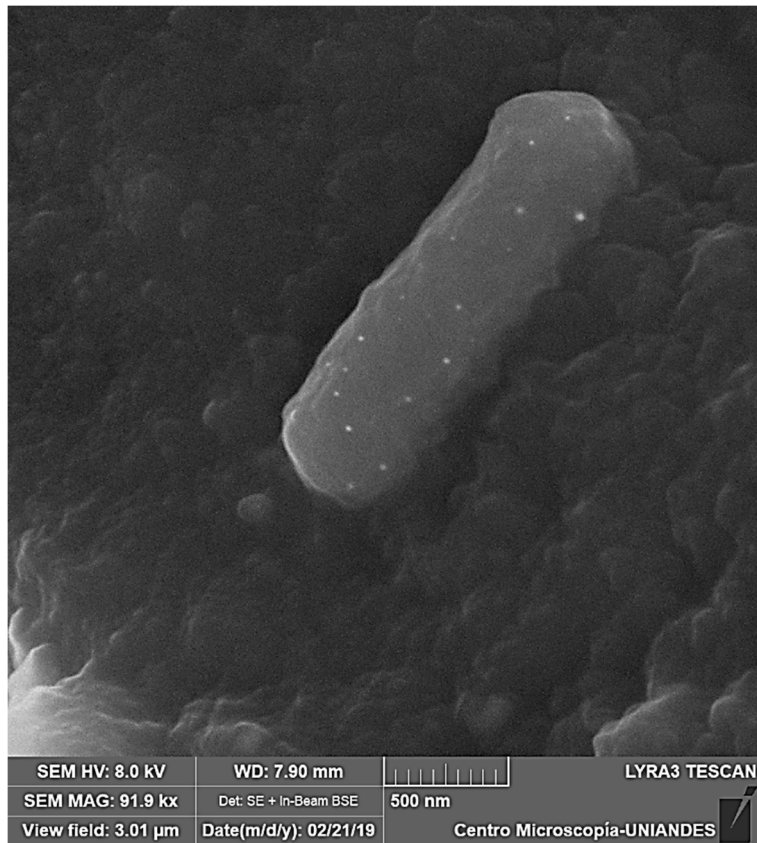

**Figure S5.** Detail of a *L. sphaericus* cell attached to RH surface.

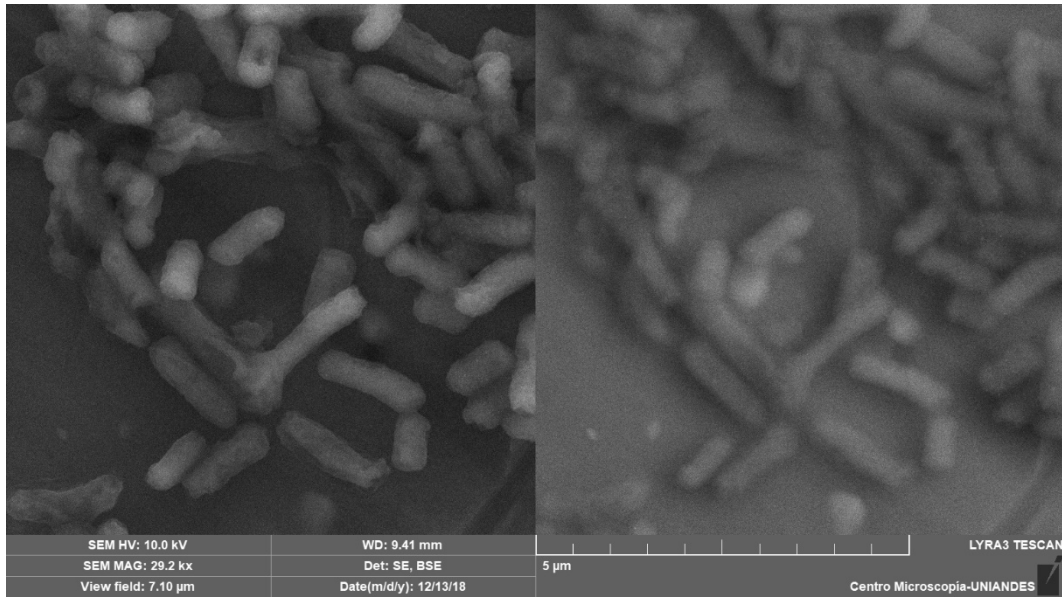

**Figure S6.** EDS-SEM of *E. coli* K12 C600 after 1 h in contact with  $\text{HgCl}_2$ .

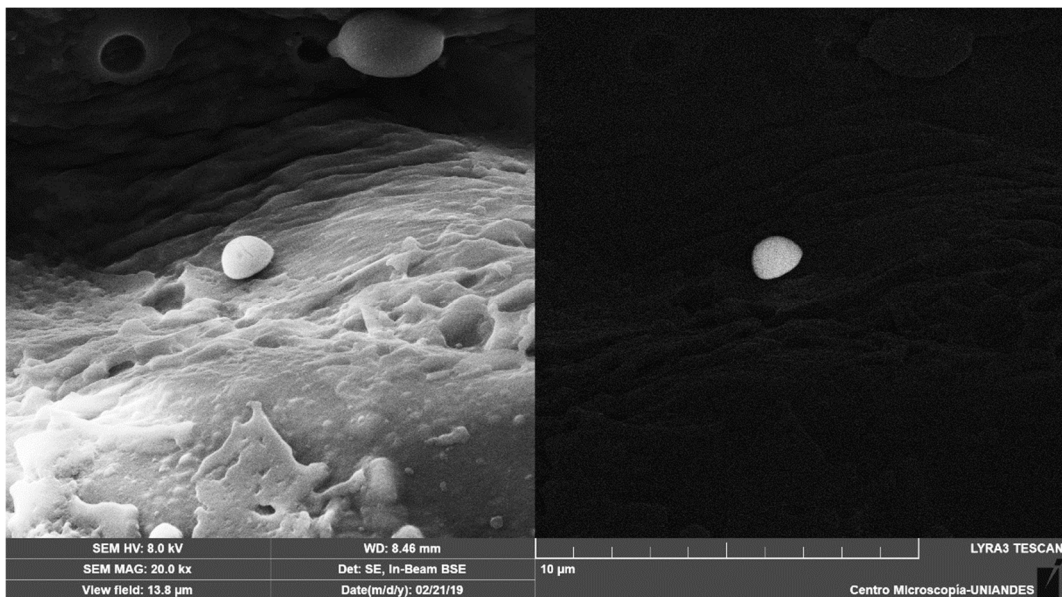

**Figure S7.** RH with a large Hg particle attached to its surface.
